# Supplementary material for: A Genome-Informed Functional Modeling Approach to Evaluate the Responses of Breast Cancer Patients to CDK4/6 Inhibitors-Based Therapies and Simulate Real-World Clinical Trials
Source: bioRxiv or medRxiv preprint supplement (doi:10.1101/2023.05.15.23289976), 2023-07-21
Supplement: Supplementary file [file media-2.pdf]

# The baseline characters of No.3 and No.4 clinical trials

|                                                       | Simulated No.3 Clinical Trial<br>(NCT03155997)<br>n=197 |        | Simulated No.4 Clinical Trial<br>(NCT02513394)<br>n=361 |        |
|-------------------------------------------------------|---------------------------------------------------------|--------|---------------------------------------------------------|--------|
|                                                       | n                                                       | %      | n                                                       | %      |
| <b>Gender</b>                                         |                                                         |        |                                                         |        |
| Female                                                | 195                                                     | 98.98% | 358                                                     | 99.17% |
| Male                                                  | 2                                                       | 1.02%  | 3                                                       | 0.83%  |
| <b>Age</b>                                            |                                                         |        |                                                         |        |
| 20-30                                                 | 1                                                       | 0.51%  | 4                                                       | 1.11%  |
| 31-40                                                 | 20                                                      | 10.15% | 25                                                      | 6.93%  |
| 41-50                                                 | 38                                                      | 19.29% | 78                                                      | 21.61% |
| 51-60                                                 | 58                                                      | 29.44% | 96                                                      | 26.59% |
| 61-70                                                 | 49                                                      | 24.87% | 94                                                      | 26.04% |
| 71-80                                                 | 22                                                      | 11.17% | 45                                                      | 12.47% |
| 81-90                                                 | 9                                                       | 4.57%  | 19                                                      | 5.26%  |
| <b>Ethnicity</b>                                      |                                                         |        |                                                         |        |
| American Indian or Alaska Native                      | 0                                                       | 0.00%  | 0                                                       | 0.00%  |
| Asian                                                 | 14                                                      | 7.11%  | 19                                                      | 5.26%  |
| Black or African American                             | 26                                                      | 13.20% | 43                                                      | 11.91% |
| White                                                 | 135                                                     | 68.53% | 259                                                     | 71.75% |
| Not reported                                          | 22                                                      | 11.17% | 40                                                      | 11.08% |
| <b>AJCC pathologic stage</b>                          |                                                         |        |                                                         |        |
| I                                                     | 17                                                      | 8.63%  | 0                                                       | 0.00%  |
| II                                                    | 79                                                      | 40.10% | 257                                                     | 71.19% |
| III                                                   | 101                                                     | 51.27% | 104                                                     | 28.81% |
| IV                                                    | 0                                                       | 0.00%  | 0                                                       | 0.00%  |
| X                                                     | 0                                                       | 0.00%  | 0                                                       | 0.00%  |
| Not reported                                          | 0                                                       | 0.00%  | 0                                                       | 0.00%  |
| <b>Pathologic type at primary diagnosis</b>           |                                                         |        |                                                         |        |
| Infiltrating duct carcinoma, NOS                      | 143                                                     | 72.59% | 252                                                     | 69.81% |
| Lobular carcinoma, NOS                                | 42                                                      | 21.32% | 89                                                      | 24.65% |
| Infiltrating duct and lobular carcinoma               | 4                                                       | 2.03%  | 7                                                       | 1.94%  |
| Infiltrating duct mixed with other types of carcinoma | 4                                                       | 2.03%  | 4                                                       | 1.11%  |
| Others                                                | 4                                                       | 2.03%  | 6                                                       | 1.66%  |
| <b>Ki-67</b>                                          |                                                         |        |                                                         |        |
| <15%                                                  | 112                                                     | 56.85% | 237                                                     | 65.65% |
| >=15%                                                 | 85                                                      | 43.15% | 124                                                     | 34.35% |

**Supplementary Table 2 | The baseline characteristics of the simulated No.3 and No.4 trials**
